# Supplementary material for: The First Evidence of the Water Bioremediation Potential of Ficopomatus enigmaticus (Fauvel 1923): From Threat to Resource?
Source: MDPI journal article supplement (doi:10.3390/w16030368), 2024-01-23
Supplement: s1 [file s1]

# The First Evidence of the Water Bioremediation Potential of *Ficopomatus enigmaticus* (Fauvel 1923): From Threat to Resource?

## SUPPLEMENTARY MATERIAL

**Table S1.** Composition and physical-chemical properties of the synthetic seawater used for bioassay with *Aliivibrio fischeri*.

|                                                                          |           |
|--------------------------------------------------------------------------|-----------|
| Sodium chloride (NaCl) (g/L)                                             | 22.0      |
| Magnesium chloride hexahydrate (MgCl <sub>2</sub> · 6 H <sub>2</sub> O)  | 9.7       |
| Sodium sulphate anhydrous (Na <sub>2</sub> SO <sub>4</sub> ) (g/L)       | 3.7       |
| Calcium chloride dihydrate (CaCl <sub>2</sub> · 2H <sub>2</sub> O) (g/L) | 1.32      |
| Potassium chloride (KCl) (g/L)                                           | 0.65      |
| Baking soda (NaHCO <sub>3</sub> ) (g/L)                                  | 0.20      |
| Boric acid (H <sub>3</sub> BO <sub>3</sub> ) (g/L)                       | 0.023     |
| Conductivity (μS/cm) (20°C)                                              | 47 ± 1    |
| Practical Salinity (20°C)                                                | 31 ± 1    |
| pH – value                                                               | 7.5 ± 0.2 |

**Table S2.** pH values measured at time 0 and after 24 hours of contact time with 25 mg/L methylene blue. CN= negative controls; L= living reefs; D= dead reefs; CP= positive controls.

|      | pH   |      | Variation |
|------|------|------|-----------|
|      | 0h   | 24h  |           |
| CN   | 8.13 | 7.07 | 1.06      |
| L_4  | 7.97 | 7.48 | 0.49      |
| L_5  | 7.97 | 7.52 | 0.45      |
| L_7  | 7.95 | 7.55 | 0.40      |
| CN_3 | 8.01 | 7.62 | 0.39      |
| L_3  | 7.97 | 7.59 | 0.38      |
| CN_1 | 8.00 | 7.67 | 0.33      |
| CN_2 | 8.00 | 7.67 | 0.33      |
| D_3  | 7.77 | 7.46 | 0.31      |
| D_5  | 7.77 | 7.46 | 0.31      |
| L_6  | 7.95 | 7.66 | 0.29      |
| CN_4 | 8.02 | 7.74 | 0.28      |
| D_2  | 7.77 | 7.51 | 0.26      |
| D_1  | 7.77 | 7.52 | 0.25      |
| D_4  | 7.77 | 7.53 | 0.24      |
| L_8  | 7.95 | 7.76 | 0.19      |
| L_1  | 7.86 | 7.68 | 0.18      |
| L_2  | 7.86 | 7.76 | 0.10      |
| CP_2 | 7.97 | 7.90 | 0.07      |
| CP_3 | 7.95 | 7.89 | 0.06      |
| CP_1 | 7.86 | 7.88 | -0.02     |
